# Supplementary material
Source: Springer Nature journal article supplement (https://www.springermedizin.de/resource/supplementary/13052_2013_551_MOESM13_ESM.pdf/9672024)

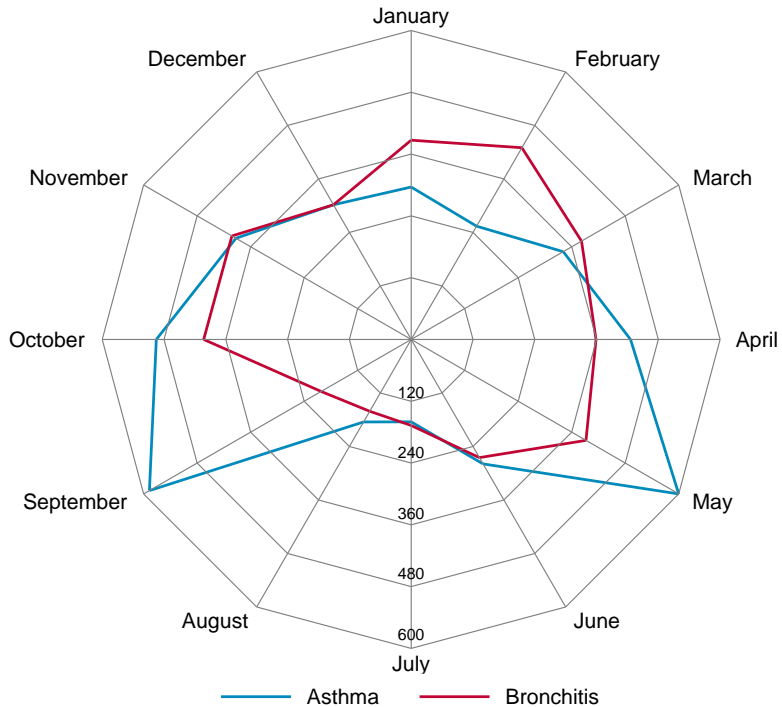

Supplement: MOESM13 [file 9672024]
